# Supplementary material for: Perceptions and Acceptability of Text Messaging for Diabetes Care in Primary Care in Argentina: Exploratory Study
Source: JMIR Diabetes. 2019 Mar 18;4(1):e10350. doi: 10.2196/10350 (PMC6441856; doi:10.2196/10350)
Supplement: Multimedia Appendix 2 [file diabetes_v4i1e10350_app2.pdf]

| Dimensions                                         | Categories                              | Characteristics / Descriptions                                                                                                                                         | Findings                                                                                                                                                                                                                                                                                                                                                                                                      | Verbatim                                                                                                                                                              |
|----------------------------------------------------|-----------------------------------------|------------------------------------------------------------------------------------------------------------------------------------------------------------------------|---------------------------------------------------------------------------------------------------------------------------------------------------------------------------------------------------------------------------------------------------------------------------------------------------------------------------------------------------------------------------------------------------------------|-----------------------------------------------------------------------------------------------------------------------------------------------------------------------|
| <b>1. General experience with SMS intervention</b> | <i>Recalled and remembered messages</i> | Where interviewees gave some SMS more attention to others is associated with cultural, behavioral, usage and thinking patterns around the disease and its consequences | <p>Most remembered messages were related to foot care</p> <p>Other messages well recalled:</p> <ul style="list-style-type: none"> <li>• Healthy diet tips</li> </ul> <p>SMS less recalled:</p> <ul style="list-style-type: none"> <li>• medical visits reminders</li> <li>• medication compliance reminders</li> <li>• glycerin control</li> </ul> <p>Messages about physical activity were not mentioned</p> | <p>“Yes, a message that was about the diabetic foot. It said that we have to wear footwear all the time because it is a silent illness.” (Woman, 51 years)</p>        |
| <b>2. Acceptability of SMS intervention</b>        | <i>Usability</i>                        | Interaction of user, system, and task in a specified setting and context                                                                                               | Reading and recording messages                                                                                                                                                                                                                                                                                                                                                                                | <p>“If there is one that interests me I’ll write it in a notebook...I keep the ones that I like the most in a notebook, so that I don’t forget” (Woman, 52 years)</p> |
|                                                    | <i>Frequency</i>                        | Refers to the preferences regarding how often receive the SMS                                                                                                          | Weekly reception, being adequate                                                                                                                                                                                                                                                                                                                                                                              | <p>“Yes, yes I’ll gladly keep receiving the messages” (Man, 63 years)</p>                                                                                             |

|                                                    |                                                                |                                                                                                              |                                                                                                                                               |                                                                                                                                                                                                                           |
|----------------------------------------------------|----------------------------------------------------------------|--------------------------------------------------------------------------------------------------------------|-----------------------------------------------------------------------------------------------------------------------------------------------|---------------------------------------------------------------------------------------------------------------------------------------------------------------------------------------------------------------------------|
|                                                    | <i>Reminder</i>                                                | Reminding care                                                                                               | The “reminder” function                                                                                                                       | “I’m happy because I forget, then I look at my cellphone, and the messages are there...I have them there...”<br>(Man, 58 years)                                                                                           |
|                                                    | <i>Sustainability</i>                                          | It refers to the ability to maintain the care compliance                                                     | Depends on the relation established with the referring physician and the proximity to the health care center                                  | “Perhaps to help another person...to go with the doctor...”<br>(Woman, 47 years)                                                                                                                                          |
| <b>3. SMS impact on knowledge about diabetes</b>   | <i>Knowledge in diabetes before and after SMS intervention</i> | It refers to the participants perception about the contribution of the SMSs on their learning about diabetes | A "mediating device" facilitates the learning processes                                                                                       | “I read all the messages to learn; there are things that I might not know and the messages could help me understand more about the illness”<br>(Man, 61 years)                                                            |
| <b>4. SMS contribution to psychosocial support</b> | <i>Feelings of support</i>                                     | Is related to the feeling of support and caring                                                              | The sense of comfort, tranquility, and the presence of someone who remembers their illness and cares for them without personally knowing them | “I feel more accompanied, I feel calmer. At least, someone who always remembers me because when you receive something in your cellphone, in your phone, you feel more comfortable, more peaceful...”<br>(Woman, 63 years) |
|                                                    | <i>Knowledge dissemination of SMS content</i>                  | It refers to how the content of the messages can reach other community members                               | The patients that receive SMS considered themselves as outreach workers of knowledge.                                                         | “I always read it because my sister also has diabetes. When we get together for tea, I receive the messages, and I show her. I tell                                                                                       |

|                                                                          |                                             |                                                                                                          |                                                                                                                                                                                     |                                                                                                                                                                                                                                                                                                                              |
|--------------------------------------------------------------------------|---------------------------------------------|----------------------------------------------------------------------------------------------------------|-------------------------------------------------------------------------------------------------------------------------------------------------------------------------------------|------------------------------------------------------------------------------------------------------------------------------------------------------------------------------------------------------------------------------------------------------------------------------------------------------------------------------|
|                                                                          |                                             |                                                                                                          | They read and share educational messages with family and friends                                                                                                                    | her that they're very useful for me..."(Woman, 53 years)                                                                                                                                                                                                                                                                     |
| <b>5. Effects of the SMS intervention on risk perception</b>             | <i>Perception about risk</i>                | It refers to the subjective judgments about the likelihood of negative occurrences related with diabetes | Associations between receiving messages with increasing awareness regarding diabetes                                                                                                | "Yes, almost all (the messages) because it makes me aware, careful, and tells me how to take care of myself. We become conscious of what we suffer from..." (Man, 59 years)                                                                                                                                                  |
| <b>6. Effect of the SMS intervention on changes in practices in care</b> | <i>Self-care practices in diabetes care</i> | It refers to behaviors undertaken by people with diabetes to successfully manage the disease             | These changes were mainly concentrated in six self-care practices: healthy eating; medical control; medicines; physical activity; foot care; assistance to the medical consultation | "The truth is that now I am more conscious, now I go more often to the "salita (clinic)"; before, I had to be called, now I go by myself. Besides, the girl in the "salita" tells me that I have to walk, watch what I eat, sometimes she tells me that she wants to check my feet, and she takes look..." (Woman, 51 years) |
|                                                                          | <i>Facilitators of diabetes care</i>        | Factors that enables diabetes care                                                                       | The relationship between the patient and access to the healthcare team                                                                                                              | "And in the message...I read it and I go show it to the doctor and ask her... and she explains it..." (Woman, 47 years)                                                                                                                                                                                                      |

|  |                                  |                                              |                                                                                                                                                                                                      |                                                                                                                                                                             |
|--|----------------------------------|----------------------------------------------|------------------------------------------------------------------------------------------------------------------------------------------------------------------------------------------------------|-----------------------------------------------------------------------------------------------------------------------------------------------------------------------------|
|  | <i>Barriers to diabetes care</i> | Factors that negatively affect diabetes care | Situations of vulnerability such as material deprivation and difficulties in accessing healthy food or medical supplies or situations of psychosocial vulnerability linked to family disarticulation | “For me it’s fine, but the more support the better. You know why? Because I am a single parent, that is to say, mom and dad all in one...understand ...?” (Woman, 47 years) |
|--|----------------------------------|----------------------------------------------|------------------------------------------------------------------------------------------------------------------------------------------------------------------------------------------------------|-----------------------------------------------------------------------------------------------------------------------------------------------------------------------------|
